# Supplementary material for: Exfoliation and Reassembly Routes to a Ge/RuO2 Nanocomposite as an Anode for Advanced Lithium-Ion Batteries
Source: MDPI journal article supplement (doi:10.3390/ijms231911766), 2022-10-04
Supplement: s1 [file s1]

# Exfoliation and Reassembly Route to a Ge/RuO<sub>2</sub> Nanocomposite as an Anode for Advanced Lithium-Ion Batteries

Jeong-Hun Jang,<sup>†</sup> Minseop Lee,<sup>†</sup> Ji-Hye Koo<sup>†</sup> and Seung-Min Paek<sup>\*</sup>

Department of Chemistry, Kyungpook National University, Daegu 41566, Korea

## Supporting Information Appendix

This Document contains supplementary data as referred to in the main manuscript.

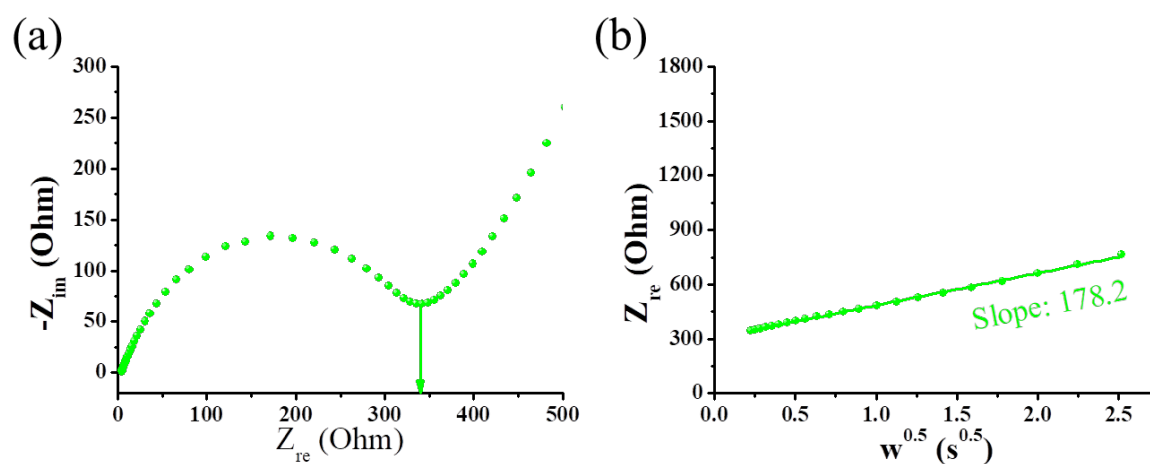

**Figure S1.** (a) Nyquist plot and (b) Warburg plot of as-prepared Ge/RuO<sub>2</sub>.
